# Supplementary material for: RBAK is upregulated in non-small cell lung cancer and promotes cell migration and invasion
Source: PubMed Central journal article supplement — Exp Ther Med. 2019 Aug 16;18(4):2942–8. doi: 10.3892/etm.2019.7900 (PMC6755425; doi:10.3892/etm.2019.7900), 2019-08-16

Figure S1. Transfection efficiency of RBAK knockdown in the A549 cell line. (A) White light and (B) green fluorescence images of shCtrl lentivirus-transfected A549 cells. (C) White light and (D) green fluorescence images of shRBAK lentivirus-transfected A549 cells. RBAK, RB-associated KRAB zinc finger; sh, short hairpin RNA.

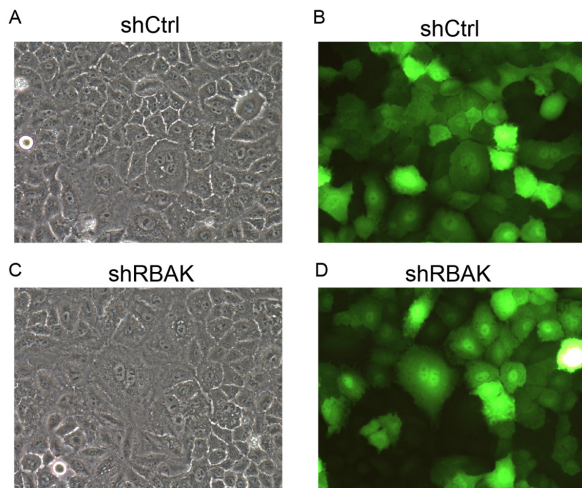

Supplement: Supplementary_Data.pdf [file Supplementary_Data.pdf]
